# Supplementary material for: Etanercept Inhibits B Cell Differentiation by Regulating TNFRII/TRAF2/NF-κB Signaling Pathway in Rheumatoid Arthritis
Source: PubMed Central journal article supplement (PMC7235293; doi:10.3389/fphar.2020.00676), 2020-05-12
Supplement: DataSheet_1.pdf [file DataSheet_1.pdf]

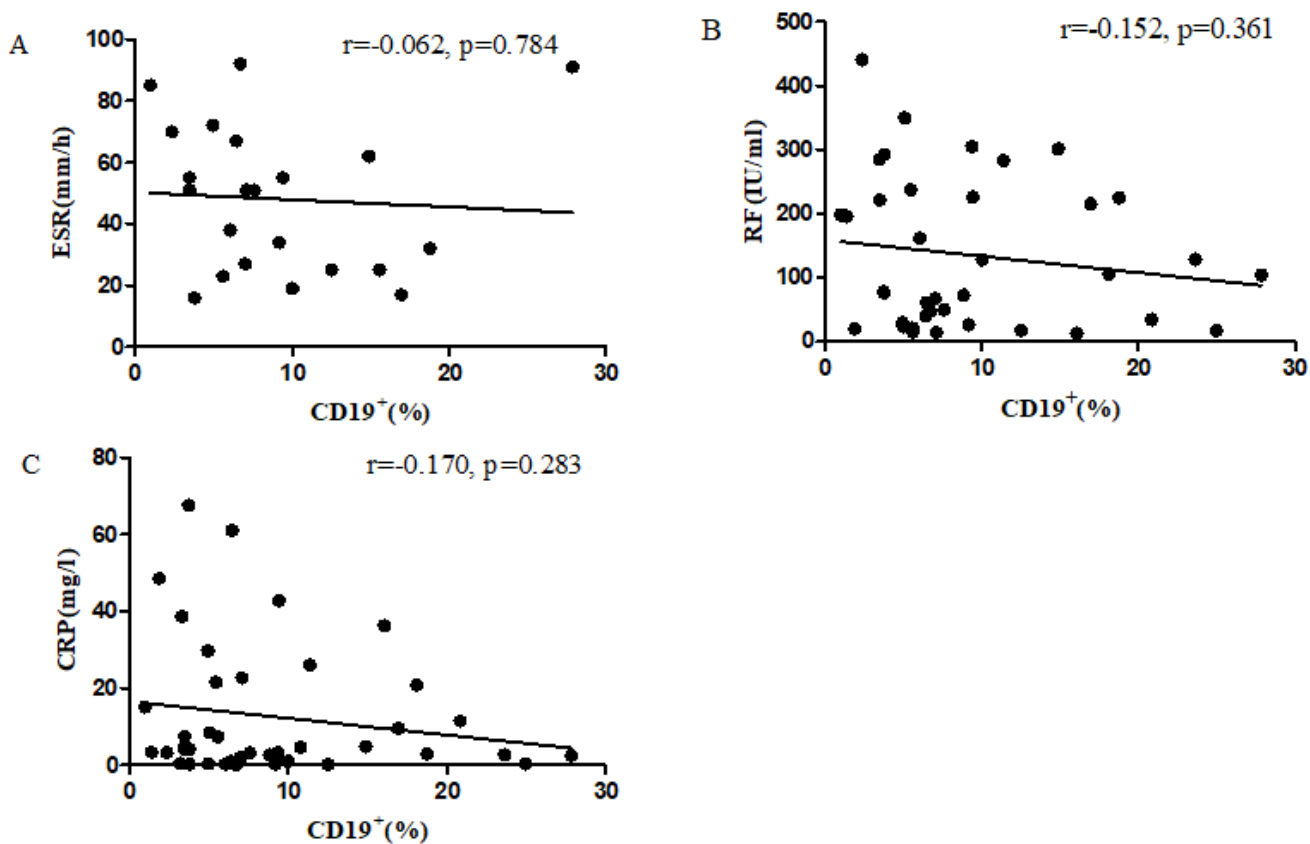

**Supplementary Figure 1.** Correlation between the percentage of CD19<sup>+</sup> B cells and laboratory parameters. (A) The correlation between percentage of CD19<sup>+</sup> B cells with ESR. (B) The correlation between percentage of CD19<sup>+</sup> B cells with RF. (C) The correlation between percentage of CD19<sup>+</sup> B cells with CRP.  $r$ , correlation coefficient;  $p$ , significant level.  $p < 0.05$  indicates statistical significance.

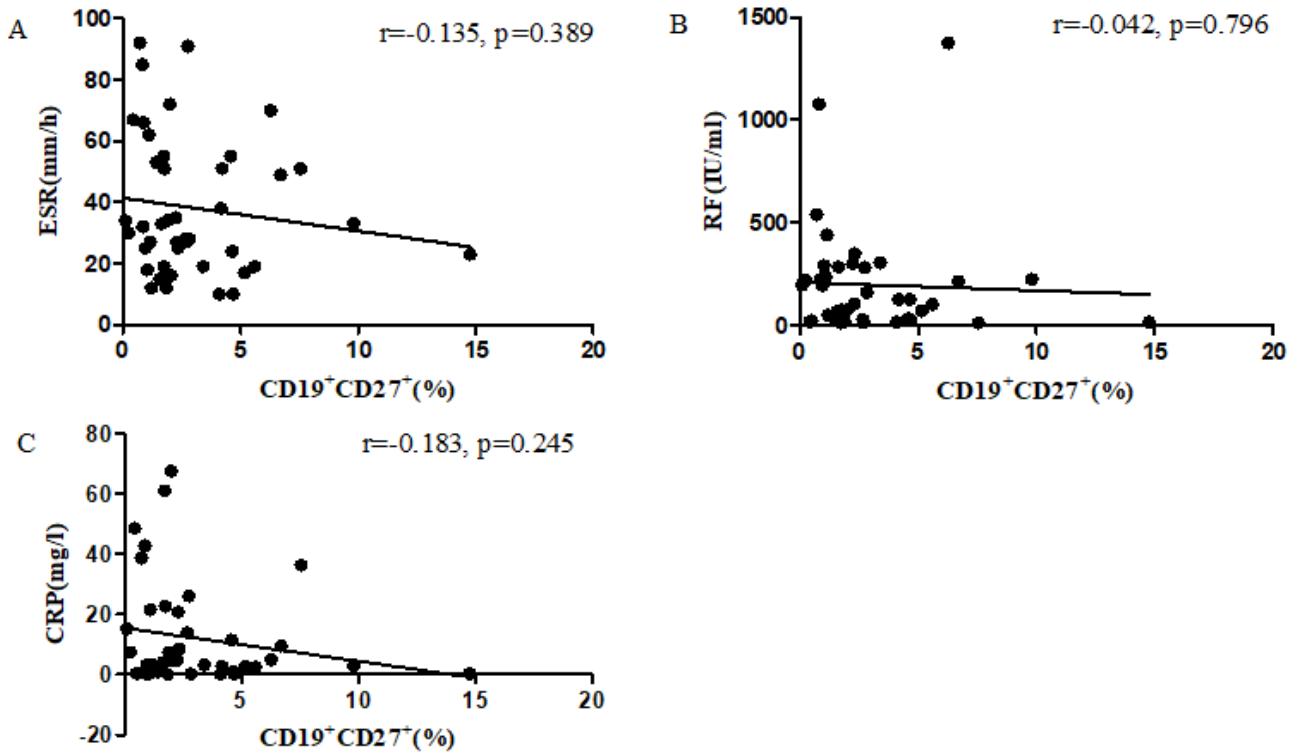

**Supplementary Figure 2.** Correlation between the percentage of CD19<sup>+</sup>CD27<sup>+</sup> B cells and laboratory parameters. (A) The correlation between percentage of CD19<sup>+</sup>CD27<sup>+</sup> B cells with ESR. (B) The correlation between percentage of CD19<sup>+</sup>CD27<sup>+</sup> B cells with RF. (C) The correlation between percentage of CD19<sup>+</sup>CD27<sup>+</sup> B cells with CRP.  $r$ , correlation coefficient;  $p$ , significant level.  $p < 0.05$  indicates statistical significance.
