# Supplementary material for: Etanercept Inhibits B Cell Differentiation by Regulating TNFRII/TRAF2/NF-κB Signaling Pathway in Rheumatoid Arthritis
Source: PubMed Central journal article supplement (PMC7235293; doi:10.3389/fphar.2020.00676), 2020-05-12
Supplement: DataSheet_2.pdf [file DataSheet_2.pdf]

Supplementary table 1: Health assessment questionnaire

RA patient HAQ total scores: \_\_\_\_\_ average scores: \_\_\_\_\_

|                                                                                                                                              |                                              |  |    |                                          |  |
|----------------------------------------------------------------------------------------------------------------------------------------------|----------------------------------------------|--|----|------------------------------------------|--|
| During the past week, you performed the following activities: 0 = no difficulty; 1 = somewhat difficult; 2 = very difficult; 3 = impossible. |                                              |  |    |                                          |  |
| 1                                                                                                                                            | Dressing (tie shoelaces and buttons)         |  | 11 | Get up or sit down from the toilet       |  |
| 2                                                                                                                                            | Comb one's hair                              |  | 12 | Bent up and pick up things on the ground |  |
| 3                                                                                                                                            | Stand up from the chair without hand support |  | 13 | Reach out and remove the coat hanger     |  |
| 4                                                                                                                                            | Go to bed, get up                            |  | 14 | Switch faucet                            |  |
| 5                                                                                                                                            | Raise a glass of drinking water              |  | 15 | Getting on and off the car               |  |
| 6                                                                                                                                            | Cut vegetables                               |  | 16 | Go shopping                              |  |
| 7                                                                                                                                            | Unscrew the bottle cap                       |  | 17 | Doing housework such as cleaning         |  |
| 8                                                                                                                                            | Walking flat outdoors                        |  | 18 | Walk one kilometer                       |  |
| 9                                                                                                                                            | Upper five steps                             |  | 19 | Participate in favorite activities       |  |
| 10                                                                                                                                           | Bathe and dry the body                       |  | 20 | Sleep well at night                      |  |

Supplementary table 2: Patient's overall pain visual analogue scale

Patient's overall pain (VAS): \_\_\_\_\_ cm (0 = no pain, 10 = pain is unbearable)

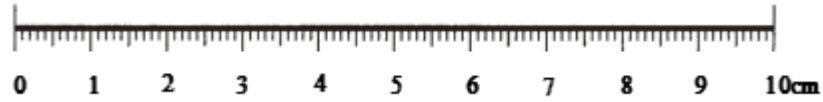

Among them, 0 points: no pain; 3 points or less: slight pain, can bear; 4 points - 6 points: the patient's pain and affect sleep, still can bear; 7 points -10 points: the patient has gradually strong pain, pain Unbearable, affecting appetite and affecting sleep.

Supplementary table 3: Tender joint counts and swollen joint counts questionnaire

| Left side                                                                  |                                                                            |                          | Joint Name                              | Right side               |                                                                            |                                                                            |
|----------------------------------------------------------------------------|----------------------------------------------------------------------------|--------------------------|-----------------------------------------|--------------------------|----------------------------------------------------------------------------|----------------------------------------------------------------------------|
| Tenderness<br>Y N N/A                                                      | Swelling<br>Y N N/A                                                        | NE                       |                                         | NE                       | Tenderness<br>Y N N/A                                                      | Swelling<br>Y N N/A                                                        |
| <input type="checkbox"/> <input type="checkbox"/> <input type="checkbox"/> | <input type="checkbox"/> <input type="checkbox"/> <input type="checkbox"/> | <input type="checkbox"/> | <i>Shoulder joint</i>                   | <input type="checkbox"/> | <input type="checkbox"/> <input type="checkbox"/> <input type="checkbox"/> | <input type="checkbox"/> <input type="checkbox"/> <input type="checkbox"/> |
| <input type="checkbox"/> <input type="checkbox"/> <input type="checkbox"/> | <input type="checkbox"/> <input type="checkbox"/> <input type="checkbox"/> | <input type="checkbox"/> | <i>Elbow joint</i>                      | <input type="checkbox"/> | <input type="checkbox"/> <input type="checkbox"/> <input type="checkbox"/> | <input type="checkbox"/> <input type="checkbox"/> <input type="checkbox"/> |
| <input type="checkbox"/> <input type="checkbox"/> <input type="checkbox"/> | <input type="checkbox"/> <input type="checkbox"/> <input type="checkbox"/> | <input type="checkbox"/> | <i>wrist joints</i>                     | <input type="checkbox"/> | <input type="checkbox"/> <input type="checkbox"/> <input type="checkbox"/> | <input type="checkbox"/> <input type="checkbox"/> <input type="checkbox"/> |
| <input type="checkbox"/> <input type="checkbox"/> <input type="checkbox"/> | <input type="checkbox"/> <input type="checkbox"/> <input type="checkbox"/> | <input type="checkbox"/> | <i>First metacarpophalangeal joint</i>  | <input type="checkbox"/> | <input type="checkbox"/> <input type="checkbox"/> <input type="checkbox"/> | <input type="checkbox"/> <input type="checkbox"/> <input type="checkbox"/> |
| <input type="checkbox"/> <input type="checkbox"/> <input type="checkbox"/> | <input type="checkbox"/> <input type="checkbox"/> <input type="checkbox"/> | <input type="checkbox"/> | <i>Second metacarpophalangeal joint</i> | <input type="checkbox"/> | <input type="checkbox"/> <input type="checkbox"/> <input type="checkbox"/> | <input type="checkbox"/> <input type="checkbox"/> <input type="checkbox"/> |
| <input type="checkbox"/> <input type="checkbox"/> <input type="checkbox"/> | <input type="checkbox"/> <input type="checkbox"/> <input type="checkbox"/> | <input type="checkbox"/> | <i>Third metacarpophalangeal joint</i>  | <input type="checkbox"/> | <input type="checkbox"/> <input type="checkbox"/> <input type="checkbox"/> | <input type="checkbox"/> <input type="checkbox"/> <input type="checkbox"/> |
| <input type="checkbox"/> <input type="checkbox"/> <input type="checkbox"/> | <input type="checkbox"/> <input type="checkbox"/> <input type="checkbox"/> | <input type="checkbox"/> | <i>Fourth metacarpophalangeal joint</i> | <input type="checkbox"/> | <input type="checkbox"/> <input type="checkbox"/> <input type="checkbox"/> | <input type="checkbox"/> <input type="checkbox"/> <input type="checkbox"/> |
| <input type="checkbox"/> <input type="checkbox"/> <input type="checkbox"/> | <input type="checkbox"/> <input type="checkbox"/> <input type="checkbox"/> | <input type="checkbox"/> | <i>Fifth metacarpophalangeal joint</i>  | <input type="checkbox"/> | <input type="checkbox"/> <input type="checkbox"/> <input type="checkbox"/> | <input type="checkbox"/> <input type="checkbox"/> <input type="checkbox"/> |
| <input type="checkbox"/> <input type="checkbox"/> <input type="checkbox"/> | <input type="checkbox"/> <input type="checkbox"/> <input type="checkbox"/> | <input type="checkbox"/> | <i>Interphalangeal joint</i>            | <input type="checkbox"/> | <input type="checkbox"/> <input type="checkbox"/> <input type="checkbox"/> | <input type="checkbox"/> <input type="checkbox"/> <input type="checkbox"/> |
| <input type="checkbox"/> <input type="checkbox"/> <input type="checkbox"/> | <input type="checkbox"/> <input type="checkbox"/> <input type="checkbox"/> | <input type="checkbox"/> | <i>Second proximal knuckle</i>          | <input type="checkbox"/> | <input type="checkbox"/> <input type="checkbox"/> <input type="checkbox"/> | <input type="checkbox"/> <input type="checkbox"/> <input type="checkbox"/> |
| <input type="checkbox"/> <input type="checkbox"/> <input type="checkbox"/> | <input type="checkbox"/> <input type="checkbox"/> <input type="checkbox"/> | <input type="checkbox"/> | <i>Third proximal knuckle</i>           | <input type="checkbox"/> | <input type="checkbox"/> <input type="checkbox"/> <input type="checkbox"/> | <input type="checkbox"/> <input type="checkbox"/> <input type="checkbox"/> |
| <input type="checkbox"/> <input type="checkbox"/> <input type="checkbox"/> | <input type="checkbox"/> <input type="checkbox"/> <input type="checkbox"/> | <input type="checkbox"/> | <i>Fourth proximal knuckle</i>          | <input type="checkbox"/> | <input type="checkbox"/> <input type="checkbox"/> <input type="checkbox"/> | <input type="checkbox"/> <input type="checkbox"/> <input type="checkbox"/> |
| <input type="checkbox"/> <input type="checkbox"/> <input type="checkbox"/> | <input type="checkbox"/> <input type="checkbox"/> <input type="checkbox"/> | <input type="checkbox"/> | <i>Fifth proximal knuckle</i>           | <input type="checkbox"/> | <input type="checkbox"/> <input type="checkbox"/> <input type="checkbox"/> | <input type="checkbox"/> <input type="checkbox"/> <input type="checkbox"/> |
| <input type="checkbox"/> <input type="checkbox"/> <input type="checkbox"/> | <input type="checkbox"/> <input type="checkbox"/> <input type="checkbox"/> | <input type="checkbox"/> | <i>Knee joint</i>                       | <input type="checkbox"/> | <input type="checkbox"/> <input type="checkbox"/> <input type="checkbox"/> | <input type="checkbox"/> <input type="checkbox"/> <input type="checkbox"/> |
